# Supplementary material
Source: PubMed Central journal article supplement (PMC3283537)
Supplement: supp_djr545_jnci-JNCI-11-0924-s04.pdf [file supp_djr545_jnci-JNCI-11-0924-s04.pdf]

**Supplementary Table 1.** Proportion of mapped genes used for the subtype classifications and the prognostic gene signatures\*

| Dataset       | Percent of mapped genes in each model |        |        |       |         |         |            |          |     |
|---------------|---------------------------------------|--------|--------|-------|---------|---------|------------|----------|-----|
|               | SCMGENE                               | SCMOD2 | SCMOD1 | PAM50 | SSP2006 | SSP2003 | MAMMAPRINT | ONCOTYPE | GGI |
| CAL           | 100                                   | 100    | 100    | 88    | 70      | 80      | 63         | 100      | 100 |
| DFHCC         | 100                                   | 100    | 100    | 100   | 71      | 86      | 74         | 100      | 100 |
| DFHCC2        | 100                                   | 100    | 100    | 100   | 71      | 86      | 74         | 100      | 100 |
| DFHCC3        | 100                                   | 100    | 100    | 100   | 71      | 86      | 74         | 100      | 100 |
| DFHCC4        | 100                                   | 100    | 100    | 100   | 71      | 86      | 74         | 100      | 100 |
| DUKE          | 100                                   | 76     | 70     | 80    | 66      | 70      | 43         | 88       | 55  |
| DUKE2         | 100                                   | 100    | 99     | 100   | 71      | 86      | 74         | 88       | 81  |
| EMC2          | 100                                   | 100    | 100    | 100   | 71      | 86      | 74         | 100      | 100 |
| EORTC10994    | 100                                   | 100    | 100    | 88    | 70      | 80      | 63         | 100      | 100 |
| EXPO          | 100                                   | 100    | 100    | 100   | 71      | 86      | 74         | 100      | 100 |
| FNCLCC        | 100                                   | 59     | 53     | 76    | 55      | 59      | 46         | 94       | 54  |
| HLP           | 100                                   | 99     | 99     | 98    | 71      | 85      | 73         | 100      | 81  |
| KOO           | 100                                   | 76     | 70     | 80    | 66      | 70      | 43         | 88       | 55  |
| LUND          | 100                                   | 84     | 84     | 82    | 60      | 72      | 64         | 88       | 73  |
| LUND2         | 100                                   | 73     | 62     | 72    | 58      | 70      | 46         | 81       | 56  |
| MAINZ         | 100                                   | 100    | 100    | 88    | 70      | 80      | 63         | 100      | 100 |
| MAQC2         | 100                                   | 100    | 100    | 88    | 70      | 80      | 63         | 100      | 100 |
| MCCC          | 100                                   | 99     | 99     | 98    | 71      | 84      | 73         | 100      | 81  |
| MDA4          | 100                                   | 100    | 100    | 88    | 70      | 80      | 63         | 100      | 100 |
| MSK           | 100                                   | 100    | 100    | 88    | 70      | 80      | 63         | 100      | 100 |
| MUG           | 100                                   | 96     | 96     | 96    | 69      | 83      | 73         | 94       | 77  |
| NCCS          | 100                                   | 100    | 100    | 88    | 70      | 80      | 63         | 100      | 100 |
| NCI           | 100                                   | 45     | 36     | 62    | 66      | 61      | 24         | 75       | 36  |
| NKI           | 100                                   | 95     | 100    | 96    | 69      | 82      | 100        | 100      | 77  |
| JBI           | 100                                   | 100    | 100    | 100   | 71      | 86      | 74         | 100      | 100 |
| STK           | 100                                   | 100    | 100    | 100   | 71      | 86      | 73         | 100      | 100 |
| STNO2         | 100                                   | 54     | 46     | 66    | 66      | 84      | 36         | 69       | 38  |
| MDA5          | 100                                   | 100    | 100    | 88    | 70      | 80      | 63         | 100      | 100 |
| VDX3          | 100                                   | 100    | 100    | 88    | 70      | 80      | 63         | 100      | 100 |
| TAM (HGU133A) | 100                                   | 100    | 100    | 88    | 70      | 80      | 63         | 100      | 100 |
| TAM           | 100                                   | 100    | 100    | 100   | 71      | 86      | 74         | 100      | 100 |
| TRANSBIG      | 100                                   | 100    | 100    | 88    | 70      | 80      | 63         | 100      | 100 |
| UCSF          | 100                                   | 58     | 51     | 62    | 63      | 64      | 34         | 88       | 44  |
| UNC4          | 100                                   | 98     | 99     | 100   | 71      | 86      | 74         | 100      | 80  |
| UNT           | 100                                   | 100    | 100    | 100   | 71      | 86      | 73         | 100      | 100 |
| UPP           | 100                                   | 100    | 100    | 100   | 71      | 86      | 73         | 100      | 100 |
| VDX           | 100                                   | 100    | 100    | 88    | 70      | 80      | 63         | 100      | 100 |

\* The three genes used in SCMGENE are present in all the microarray platforms. Note that ONCOTYPE models do not allow for

missing genes; therefore the ONCOTYPE risk predictions were not computed when genes were missing. SCMGENE: three-gene subtype classification model; SCMOD2: subtype classification model published by Wirapati et al. (8); SCMOD1: subtype classification model published by Desmedt et al. (1); PAM50: single sample predictor published by Parker et al. (3); SSP2006: single sample predictor published by Hu et al. (2). SSP2003: single sample predictor published Sorlie et al. (6); MAMMAPRINT: prognostic gene signature published by van't Veer et al. (14); ONCOTYPE: prognostic gene signature published by Paik et al. (15); GGI: prognostic gene signature published by Sotiriou et al. (16). Each dataset was assigned a short acronym and an instance number if several datasets were published by the same institution or consortium: EXPO: expression project for oncology, large dataset of microarray data published by the International Genomics Consortium (United States); VDX: Veridex (The Netherlands); NKI: National Kanker Instituut (The Netherlands); UCSF: University of California, San Francisco (United States); STNO: Stanford/Norway (United States and Norway); NCI: National Cancer Institute (United States); MSK Memorial Sloan-Kettering (United States); UPP: Uppsala hospital (Sweden); STK: Stockholm. Karolinska university hospital (Sweden); UNT: cohort of untreated breast cancer patients from the Oxford Radcliffe (United Kingdom) and Karolinska (Sweden) hospitals; UNC: University of North Carolina (United States); DUKE: Duke university hospital (United States); CAL: dataset of breast cancer patients from the University of California, San Francisco and the California Pacific Medical Center (United States); TRANSBIG: dataset collected by the TransBIG consortium (Europe); MAINZ: Mainz hospital (Germany); LUND: Lund University Hospital (Sweden); FNCLCC: Fédération Nationale des Centres de Lutte contre le Cancer (France); MDA: MD Anderson Cancer Center (United States); EMC: Erasmus Medical Center (The Netherlands); MUG: Medical University of Graz (Austria); NCCS: National Cancer Centre of Singapore (Singapore); MCCC: Peter MacCallum Cancer Centre (Australia); KOO: Koo Foundation Sun Yat-Sen Cancer Centre (Taiwan); EORTC10994: Trial number 10994 from the European Organization for Research and Treatment of Cancer Breast Cancer; (Europe) HLP: University Hospital La Paz (Spain); DFHCC: Dana-Farber Harvard Cancer Center (United States); MAQC: Microarray quality control consortium (United States); JBI: Jules Bordet Institute (Belgium).

**Supplementary Table 2.** Robustness of the subtyping as estimated by the prediction strength for classification into three subtypes in all the test sets\*

| <b>Dataset</b> | <b>SCMGENE</b> | <b>SCMOD2</b> | <b>SCMOD1</b> | <b>PAM50</b> | <b>SSP2006</b> | <b>SSP2003</b> |
|----------------|----------------|---------------|---------------|--------------|----------------|----------------|
| CAL            | 0.875          | 1.000         | 0.875         | 0.505        | 0.491          | 0.000          |
| DFHCC          | 0.875          | 0.795         | 0.732         | 0.584        | 0.528          | 0.522          |
| DFHCC2         | 1.000          | 0.655         | 0.673         | 0.857        | 0.663          | 0.000          |
| DFHCC3         | 0.900          | 0.750         | 0.500         | 1.000        | 0.500          | 0.753          |
| DUKE           | 0.750          | 0.579         | 0.682         | 0.771        | 0.405          | 0.479          |
| DUKE2          | 0.642          | 0.535         | 0.586         | 0.913        | 0.495          | 0.496          |
| EMC2           | 0.867          | 0.908         | 0.878         | 0.699        | 0.568          | 0.333          |
| EORTC10994     | 1.000          | 0.909         | 0.718         | 0.467        | 0.333          | 0.791          |
| FNCLCC         | 0.768          | 0.830         | 0.905         | 0.687        | 0.425          | 0.200          |
| HLP            | 0.931          | 0.833         | 0.591         | 0.600        | 0.487          | 0.558          |
| DFHCC4         | 0.601          | 0.618         | 0.767         | 0.875        | 0.534          | 0.925          |
| KOO            | 0.628          | 0.458         | 0.970         | 0.685        | 0.444          | 0.439          |
| LUND           | 0.760          | 0.824         | 0.799         | 0.483        | 0.498          | 0.495          |
| LUND2          | 0.662          | 0.644         | 1.000         | 0.803        | 0.379          | 0.455          |
| MAINZ          | 0.419          | 0.987         | 0.987         | 0.686        | 0.495          | 0.703          |
| MAQC2          | 0.970          | 0.384         | 0.867         | 0.581        | 0.596          | 0.478          |
| MCCC           | 0.929          | 0.714         | 0.827         | 0.583        | 0.623          | 0.000          |
| MDA4           | 1.000          | 0.463         | 0.900         | 0.492        | 0.599          | 0.333          |
| MSK            | 1.000          | 0.833         | 0.900         | 0.488        | 0.667          | 0.300          |
| MUG            | 0.429          | 0.426         | 0.519         | 0.382        | 0.436          | 0.331          |
| NCCS           | 0.964          | 0.618         | 0.537         | 0.770        | 0.507          | 0.333          |
| NCI            | 0.636          | 0.846         | 0.697         | 0.392        | 0.429          | 0.321          |
| NKI            | 0.892          | 0.820         | 0.959         | 0.715        | 0.531          | 0.400          |
| JB1            | 1.000          | 0.905         | 0.882         | 0.720        | 0.333          | 0.000          |
| STK            | 0.605          | 0.948         | 0.915         | 0.537        | 0.455          | 0.440          |
| STNO2          | 0.912          | 0.913         | 0.580         | 0.464        | 0.382          | 0.467          |
| TRANSBIG       | 0.969          | 1.000         | 0.844         | 0.517        | 0.486          | 0.333          |
| UCSF           | 0.823          | 0.905         | 0.926         | 0.448        | 0.471          | 0.477          |
| UNC4           | 0.896          | 1.000         | 0.897         | 0.579        | 0.533          | 0.677          |
| UNT            | 0.978          | 0.820         | 0.889         | 0.958        | 0.485          | 0.456          |
| UPP            | 0.887          | 0.738         | 0.914         | 0.621        | 0.498          | 0.512          |
| VDX            | 0.805          | 0.958         | 0.829         | 0.512        | 0.407          | 0.301          |
| median         | 0.881          | 0.822         | 0.856         | 0.592        | 0.493          | 0.448          |
| mad            | 0.156          | 0.173         | 0.118         | 0.160        | 0.066          | 0.170          |
| mean           | 0.824          | 0.769         | 0.798         | 0.637        | 0.490          | 0.416          |
| sd             | 0.167          | 0.182         | 0.148         | 0.167        | 0.084          | 0.223          |

\*Prediction strength statistics for the identification of three main subtypes by each subtype classifier in each test dataset. SCMGENE: three-gene subtype classification model; SCMOD2: subtype classification model published by Wirapati et al. (8); SCMOD1: subtype classification model published by Desmedt et al. (1); PAM50: single sample predictor published by Parker et al. (3); SSP2006: single sample predictor published by Hu et al. (2). SSP2003: single sample predictor published Sorlie et al. (6). Each dataset was assigned a short acronym and an instance number if several datasets were published by the same institution or consortium: EXPO: expression project for oncology, large dataset of microarray data published by the International Genomics Consortium (United States); VDX: Veridex (The Netherlands); NKI: National Kanker Instituut (The Netherlands); UCSF: University of California, San Francisco (United States); STNO: Stanford/Norway (United States and Norway); NCI: National Cancer Institute (United States); MSK Memorial Sloan-Kettering (United States); UPP: Uppsala hospital (Sweden); STK: Stockholm. Karolinska university hospital (Sweden); UNT: cohort of untreated breast cancer patients from the Oxford Radcliffe (United Kingdom) and Karolinska (Sweden) hospitals; UNC: University of North Carolina (United States); DUKE: Duke university hospital (United States); CAL: dataset of breast cancer patients from the University of California, San Francisco and the California Pacific Medical Center (United States); TRANSBIG: dataset collected by the TransBIG consortium (Europe); MAINZ: Mainz hospital (Germany); LUND: Lund University Hospital (Sweden); FNCLCC: Fédération Nationale des Centres de Lutte contre le Cancer (France); MDA: MD Anderson Cancer Center (United States); EMC: Erasmus Medical Center (The Netherlands); MUG: Medical University of Graz (Austria); NCCS: National Cancer Centre of Singapore (Singapore); MCCC: Peter MacCallum Cancer Centre

(Australia); KOO: Koo Foundation Sun Yat-Sen Cancer Centre (Taiwan); EORTC10994: Trial number 10994 from the European Organization for Research and Treatment of Cancer Breast Cancer; (Europe) HLP: University Hospital La Paz (Spain); DFHCC: Dana-Farber Harvard Cancer Center (United States); MAQC: Microarray quality control consortium (United States); JBI: Jules Bordet Institute (Belgium). Median and median-absolute deviation (mad), mean and standard deviation (sd) are provided as a summary for each subtype classifier.

**Supplementary Table 3.** Robustness of the subtyping as estimated by the prediction strength for classification into four subtypes in all the test sets.\*

| Dataset    | SCMGENE | SCMOD2 | SCMOD1 | PAM50 | SSP2006 | SSP2003 |
|------------|---------|--------|--------|-------|---------|---------|
| CAL        | 0.875   | 1.000  | 0.843  | 0.000 | 0.489   | 0.467   |
| DFHCC      | 0.875   | 0.795  | 0.732  | 0.584 | 0.194   | 0.000   |
| DFHCC2     | 1.000   | 0.655  | 0.655  | 0.500 | 0.000   | 0.000   |
| DFHCC3     | 0.900   | 0.750  | 0.444  | 1.000 | 0.000   | 0.575   |
| DUKE       | 0.749   | 0.579  | 0.671  | 0.500 | 0.345   | 0.456   |
| DUKE2      | 0.636   | 0.513  | 0.545  | 0.000 | 0.352   | 0.333   |
| EMC2       | 0.865   | 0.908  | 0.876  | 0.000 | 0.251   | 0.300   |
| EORTC10994 | 1.000   | 0.867  | 0.705  | 0.000 | 0.000   | 0.000   |
| FNCLCC     | 0.764   | 0.830  | 0.892  | 0.489 | 0.310   | 0.167   |
| HLP        | 0.857   | 0.800  | 0.561  | 0.600 | 0.435   | 0.558   |
| DFHCC4     | 0.556   | 0.618  | 0.767  | 0.875 | 0.167   | 0.516   |
| KOO        | 0.628   | 0.458  | 0.926  | 0.100 | 0.393   | 0.167   |
| LUND       | 0.751   | 0.806  | 0.747  | 0.344 | 0.325   | 0.342   |
| LUND2      | 0.652   | 0.644  | 1.000  | 0.500 | 0.309   | 0.167   |
| MAINZ      | 0.252   | 0.974  | 0.976  | 0.462 | 0.293   | 0.218   |
| MAQC2      | 0.970   | 0.261  | 0.866  | 0.493 | 0.353   | 0.389   |
| MCCC       | 0.929   | 0.714  | 0.786  | 0.341 | 0.000   | 0.000   |
| MDA4       | 1.000   | 0.259  | 0.870  | 0.365 | 0.509   | 0.461   |
| MSK        | 1.000   | 0.833  | 0.900  | 0.143 | 0.257   | 0.400   |
| MUG        | 0.321   | 0.200  | 0.504  | 0.244 | 0.281   | 0.271   |
| NCCS       | 0.964   | 0.610  | 0.504  | 0.489 | 0.251   | 0.333   |
| NCI        | 0.618   | 0.846  | 0.697  | 0.364 | 0.394   | 0.286   |
| NKI        | 0.892   | 0.820  | 0.959  | 0.167 | 0.380   | 0.300   |
| JBI        | 1.000   | 0.905  | 0.882  | 0.508 | 0.000   | 0.000   |
| STK        | 0.605   | 0.908  | 0.875  | 0.267 | 0.437   | 0.250   |
| STNO2      | 0.907   | 0.913  | 0.553  | 0.361 | 0.238   | 0.410   |
| TRANSBIG   | 0.952   | 1.000  | 0.800  | 0.414 | 0.307   | 0.333   |
| UCSF       | 0.820   | 0.905  | 0.924  | 0.420 | 0.286   | 0.357   |
| UNC4       | 0.896   | 1.000  | 0.858  | 0.539 | 0.221   | 0.486   |
| UNT        | 0.970   | 0.728  | 0.854  | 0.000 | 0.179   | 0.167   |
| UPP        | 0.887   | 0.734  | 0.843  | 0.300 | 0.416   | 0.228   |
| VDX        | 0.805   | 0.958  | 0.829  | 0.327 | 0.245   | 0.342   |
| median     | 0.875   | 0.803  | 0.836  | 0.364 | 0.290   | 0.317   |
| mad        | 0.152   | 0.160  | 0.131  | 0.201 | 0.118   | 0.176   |
| mean       | 0.809   | 0.743  | 0.776  | 0.366 | 0.269   | 0.290   |
| sd         | 0.191   | 0.218  | 0.152  | 0.240 | 0.144   | 0.168   |

\*Prediction strength statistics for the identification of four main subtypes by each subtype classifier in each test dataset. SCMGENE: three-gene subtype classification model; SCMOD2: subtype classification model published by Wirapati et al. (8); SCMOD1: subtype classification model published by Desmedt et al. (1); PAM50: single sample predictor published by Parker et al. (3); SSP2006: single sample predictor published by Hu et al. (2). SSP2003: single sample predictor published Sorlie et al. (6). Each dataset was assigned a short acronym and an instance number if several datasets were published by the same institution or consortium: EXPO: expression project for oncology, large dataset of microarray data published by the International Genomics Consortium (United States); VDX: Veridex (The Netherlands); NKI: National Kanker Instituut (The Netherlands); UCSF: University of California, San Francisco (United States); STNO: Stanford/Norway (United States and Norway); NCI: National Cancer Institute (United States); MSK Memorial Sloan-Kettering (United States); UPP: Uppsala hospital (Sweden); STK: Stockholm. Karolinska university hospital (Sweden); UNT: cohort of untreated breast cancer patients from the Oxford Radcliffe (United Kingdom) and Karolinska (Sweden) hospitals; UNC: University of North Carolina (United States); DUKE: Duke university hospital (United States); CAL: dataset of breast cancer patients from the University of California, San Francisco and the California Pacific Medical Center (United States); TRANSBIG: dataset collected by the TransBIG consortium (Europe); MAINZ: Mainz hospital (Germany); LUND: Lund University Hospital (Sweden); FNCLCC: Fédération Nationale des Centres de Lutte contre le Cancer (France); MDA: MD Anderson Cancer Center (United States); EMC: Erasmus Medical Center (The Netherlands); MUG:

Medical University of Graz (Austria); NCCS: National Cancer Centre of Singapore (Singapore); MCCC: Peter MacCallum Cancer Centre (Australia); KOO: Koo Foundation Sun Yat-Sen Cancer Centre (Taiwan); EORTC10994: Trial number 10994 from the European Organization for Research and Treatment of Cancer Breast Cancer; (Europe) HLP: University Hospital La Paz (Spain); DFHCC: Dana-Farber Harvard Cancer Center (United States); MAQC: Microarray quality control consortium (United States); JBI: Jules Bordet Institute (Belgium). Median and median-absolute deviation (mad), mean and standard deviation (sd) are provided as a summary for each subtype classifier.

**Supplementary Table 4.** Robustness of the subtyping as estimated by the prediction strength for classification into five subtypes in all the test sets\*

| <b>Dataset</b> | <b>PAM50</b> | <b>SSP2006</b> | <b>SSP2003</b> |
|----------------|--------------|----------------|----------------|
| CAL            | 0.575        | 0.000          | 0.651          |
| DFHCC          | 0.493        | 0.267          | 0.000          |
| DFHCC2         | 0.000        | 0.000          | 0.000          |
| DFHCC3         | 0.000        | 0.000          | 0.000          |
| DUKE           | 0.428        | 0.397          | 0.345          |
| DUKE2          | 0.412        | 0.250          | 0.333          |
| EMC2           | 0.000        | 0.390          | 0.167          |
| EORTC10994     | 0.471        | 0.000          | 0.000          |
| FNCLCC         | 0.282        | 0.228          | 0.167          |
| HLP            | 0.321        | 0.382          | 0.558          |
| DFHCC4         | 0.000        | 0.000          | 0.000          |
| KOO            | 0.167        | 0.421          | 0.000          |
| LUND           | 0.298        | 0.228          | 0.285          |
| LUND2          | 0.278        | 0.167          | 0.300          |
| MAINZ          | 0.424        | 0.319          | 0.200          |
| MAQC2          | 0.167        | 0.325          | 0.296          |
| MCCC           | 0.000        | 0.000          | 0.000          |
| MDA4           | 0.000        | 0.333          | 0.435          |
| MSK            | 0.067        | 0.000          | 0.333          |
| MUG            | 0.190        | 0.195          | 0.242          |
| NCCS           | 0.503        | 0.291          | 0.232          |
| NCI            | 0.167        | 0.500          | 0.000          |
| NKI            | 0.167        | 0.448          | 0.200          |
| JBI            | 0.000        | 0.000          | 0.000          |
| STK            | 0.200        | 0.248          | 0.333          |
| STNO2          | 0.190        | 0.333          | 0.318          |
| TRANSBIG       | 0.000        | 0.448          | 0.000          |
| UCSF           | 0.249        | 0.250          | 0.258          |
| UNC4           | 0.333        | 0.324          | 0.381          |
| UNT            | 0.000        | 0.300          | 0.000          |
| UPP            | 0.300        | 0.456          | 0.250          |
| VDX            | 0.255        | 0.243          | 0.324          |
| median         | 0.195        | 0.258          | 0.237          |
| mad            | 0.247        | 0.160          | 0.151          |
| mean           | 0.217        | 0.242          | 0.206          |
| sd             | 0.178        | 0.162          | 0.180          |

\*Prediction strength statistics for the identification of five main subtypes by the single sample predictors in each test dataset. PAM50: single sample predictor published by Parker et al. (3); SSP2006: single sample predictor published by Hu et al. (2). SSP2003: single sample predictor published Sorlie et al. (6). Each dataset was assigned a short acronym and an instance number if several datasets were published by the same institution or consortium: EXPO: expression project for oncology, large dataset of microarray data published by the International Genomics Consortium (United States); VDX: Veridex (The Netherlands); NKI: National Kanker Instituut (The Netherlands); UCSF: University of California, San Francisco (United States); STNO: Stanford/Norway (United States and Norway); NCI: National Cancer Institute (United States); MSK Memorial Sloan-Kettering (United States); UPP: Uppsala hospital (Sweden); STK: Stockholm. Karolinska university hospital (Sweden); UNT: cohort of untreated breast cancer patients from the Oxford Radcliffe (United Kingdom) and Karolinska (Sweden) hospitals; UNC: University of North Carolina (United States); DUKE: Duke university hospital (United States); CAL: dataset of breast cancer patients from the University of California, San Francisco and the California Pacific Medical Center (United States); TRANSBIG: dataset collected by the TransBIG consortium (Europe); MAINZ: Mainz hospital (Germany); LUND: Lund University Hospital (Sweden); FNCLCC: Fédération Nationale des Centres de Lutte contre le Cancer (France); MDA: MD Anderson Cancer Center (United States); EMC: Erasmus Medical Center (The Netherlands); MUG: Medical University of Graz (Austria); NCCS: National Cancer Centre of Singapore (Singapore); MCCC: Peter MacCallum Cancer Centre (Australia); KOO: Koo Foundation Sun Yat-Sen Cancer Centre (Taiwan); EORTC10994: Trial number 10994 from the European Organization for Research and Treatment of Cancer Breast Cancer; (Europe) HLP:

University Hospital La Paz (Spain); DFHCC: Dana-Farber Harvard Cancer Center (United States); MAQC: Microarray quality control consortium (United States); JBI: Jules Bordet Institute (Belgium). Median and median-absolute deviation (mad), mean and standard deviation (sd) are provided as a summary for each subtype classifier.



**Supplementary Table 5.** Comparison of the prediction strength of the six subtype classifiers for classification into three, four, and five subtypes\*

| Model                                     | Median difference (95% CI), <i>P</i>    |                                         |                                         |                                          |                                         |
|-------------------------------------------|-----------------------------------------|-----------------------------------------|-----------------------------------------|------------------------------------------|-----------------------------------------|
|                                           | SCMGENE                                 | SCMOD2                                  | SCMOD1                                  | PAM50                                    | SSP2006                                 |
| <b>Classification into three subtypes</b> |                                         |                                         |                                         |                                          |                                         |
| SCMOD2                                    | -0.052 (-0.12 to 0.015), <i>P</i> =.36  |                                         |                                         |                                          |                                         |
| SCMOD1                                    | -0.03 (-0.11 to 0.039), <i>P</i> =.86   | 0.012 (-0.052 to 0.084), <i>P</i> =.86  |                                         |                                          |                                         |
| PAM50                                     | -0.2 (-0.29 to -0.11), <i>P</i> <.001   | -0.13 (-0.26 to -0.032), <i>P</i> =.078 | -0.2 (-0.27 to -0.088), <i>P</i> =.0046 |                                          |                                         |
| SSP2006                                   | -0.35 (-0.39,-0.28), <i>P</i> <.001     | -0.29 (-0.37 to -0.2), <i>P</i> <.001   | -0.33 (-0.38 to -0.26), <i>P</i> <.001  | -0.14 (-0.22 to -0.072), <i>P</i> <.001  |                                         |
| SSP2003                                   | -0.4 (-0.52 to -0.3), <i>P</i> <.001    | -0.35 (-0.46 to -0.24), <i>P</i> <.001  | -0.38 (-0.5 to -0.29), <i>P</i> <.001   | -0.21 (-0.3 to -0.12), <i>P</i> <.001    | -0.061 (-0.15 to 0.013), <i>P</i> =.36  |
| <b>Classification into four subtypes</b>  |                                         |                                         |                                         |                                          |                                         |
| SCMOD2                                    | -0.056 (-0.14 to 0.007), <i>P</i> =0.50 |                                         |                                         |                                          |                                         |
| SCMOD1                                    | -0.046 (-0.12 to 0.039), <i>P</i> =0.76 | 0.0043 (-0.064 to 0.099), <i>P</i> =1.0 |                                         |                                          |                                         |
| PAM50                                     | -0.45 (-0.56 to -0.35), <i>P</i> <.001  | -0.4 (-0.51 to -0.26), <i>P</i> <.001   | -0.43 (-0.52 to -0.33), <i>P</i> <.001  |                                          |                                         |
| SSP2006                                   | -0.54 (-0.64 to -0.44), <i>P</i> <.001  | -0.51 (-0.59 to -0.39), <i>P</i> <.001  | -0.51 (-0.58 to -0.44), <i>P</i> <.001  | -0.085 (-0.19 to 0.024), <i>P</i> =.60   |                                         |
| SSP2003                                   | -0.51 (-0.61 to -0.43), <i>P</i> <.001  | -0.48 (-0.58 to -0.36), <i>P</i> <.001  | -0.49 (-0.59 to -0.4), <i>P</i> <.001   | -0.063 (-0.18 to 0.015), <i>P</i> =.50   | 0.0083 (-0.049 to 0.075), <i>P</i> =1.0 |
| <b>Classification into five subtypes</b>  |                                         |                                         |                                         |                                          |                                         |
| SSP2006                                   |                                         |                                         |                                         | 0.035 (-0.061 to 0.14), <i>P</i> = 1.0   |                                         |
| SSP2003                                   |                                         |                                         |                                         | -0.0013 (-0.09 to 0.077), <i>P</i> = 1.0 | -0.045 (-0.15 to 0.052), <i>P</i> = 1.0 |

\* Two-sided *P*-values estimated by two-sample Wilcoxon signed rank test in order to compare the prediction strength (the higher the better) of the six subtype classifiers for classification into three, four, and five subtypes. The median difference is to be interpreted as the prediction strength of the classifier in row minus the prediction strength of the classifier in column. Note that *P*-values were corrected for multiple testing using Holm's method. SCMGENE: three-gene subtype classification model; SCMOD2: subtype classification model published by Wirapati et al. (8); SCMOD1: subtype classification model published by Desmedt et al. (1); PAM50: single sample predictor published by Parker et al. (3); SSP2006: single sample predictor published by Hu et al. (2). SSP2003: single sample predictor published Sorlie et al. (6).

**Supplementary Table 6.** Estimation of the prognostic value of the subtype classifiers and prognostic gene signatures through cross-validated partial (log-)likelihood.

|      | <i>SCMGENE</i> | <i>SCMOD2</i> | <i>SCMOD1</i> | <i>PAM50</i> | <i>SSP2006</i> | <i>SSP2003</i> | <i>MAMMAPRINT</i> | <i>ONCOTYPE</i> | <i>GGI</i> |
|------|----------------|---------------|---------------|--------------|----------------|----------------|-------------------|-----------------|------------|
| CVPL | 1.649          | 1.651         | 1.656         | 1.668        | 1.653          | 1.667          | 1.648             | 1.646           | 1.651      |

\*Two-sided *P*-values estimated by two-sample Wilcoxon signed rank test comparing the cross-validated partial (log-)likelihood (CVPL, the lower the better) of the subtype classifiers and published prognostic gene signatures. The median difference is to be interpreted as the CVPL of the classifier in row minus the CVPL of the classifier in column. Note that *P*-values were corrected for multiple testing using Holm's method. *SCMGENE*: three-gene subtype classification model; *SCMOD2*: subtype classification model published by Wirapati et al. (8); *SCMOD1*: subtype classification model published by Desmedt et al. (1); *PAM50*: single sample predictor published by Parker et al. (3); *SSP2006*: single sample predictor published by Hu et al. (2). *SSP2003*: single sample predictor published Sorlie et al. (6); *MAMMAPRINT*: prognostic gene signature published by van't Veer et al. (14); *ONCOTYPE*: prognostic gene signature published by Paik et al. (15); *GGI*: prognostic gene signature published by Sotiriou et al. (16), CVPL: cross-validated partial (log-)likelihood.

**Supplementary Table 7.** Comparison of comparing the cross-validated partial (log-)likelihood (CVPL, the lower the better) of the subtype classifiers and published prognostic gene signatures\*

| Model                                       | Median difference (95% CI), <i>P</i>        |                                             |                                            |                                            |                                          |                                             |
|---------------------------------------------|---------------------------------------------|---------------------------------------------|--------------------------------------------|--------------------------------------------|------------------------------------------|---------------------------------------------|
|                                             | SCMGENE                                     | SCMOD2                                      | SCMOD1                                     | PAM50                                      | SSP2006                                  | SSP2003                                     |
| <b>Subtype classifiers</b>                  |                                             |                                             |                                            |                                            |                                          |                                             |
| SCMOD2                                      | -0.008 (-0.018 to 0.0022), <i>P</i> =1.0    |                                             |                                            |                                            |                                          |                                             |
| SCMOD1                                      | -0.0031 (-0.011 to 0.0078), <i>P</i> =1.0   | 0.0045 (-0.00024 to 0.0099), <i>P</i> =.9   |                                            |                                            |                                          |                                             |
| PAM50                                       | -0.00042 (-0.0082 to 0.0073), <i>P</i> =1.0 | 0.0073 (-0.0002 to 0.013), <i>P</i> =.9     | 0.0014 (-0.0084 to 0.011), <i>P</i> =1.0   | -0.0008 (-0.02 to 0.0067), <i>P</i> =1.0   |                                          |                                             |
| SSP2006                                     | -0.0056 (-0.016 to 0.0072), <i>P</i> =1.0   | 0.006 (-0.012 to 0.013), <i>P</i> =1.0      | -0.0028 (-0.016 to 0.011), <i>P</i> =1.0   |                                            |                                          |                                             |
| SSP2003                                     | 0.0091 (-0.0058 to 0.024), <i>P</i> =1.0    | 0.016 (0.0037 to 0.028), <i>P</i> =.41      | 0.011 (-0.00086 to 0.024), <i>P</i> =1.0   | 0.0085 (-0.0052 to 0.022), <i>P</i> =1.0   | 0.012 (-0.0021 to 0.031), <i>P</i> =1.0  |                                             |
| <b>Published prognostic gene signatures</b> |                                             |                                             |                                            |                                            |                                          |                                             |
| MAMMAPRINT                                  | -0.012 (-0.021 to 0.00034), <i>P</i> =.9    | -0.0015 (-0.011 to 0.0039), <i>P</i> =1.0   | -0.0076 (-0.019 to 0.00045), <i>P</i> =1.0 | -0.007 (-0.022 to -0.00022), <i>P</i> =.73 | -0.008 (-0.023 to 0.018), <i>P</i> =1.0  | -0.022 (-0.031 to -0.0079), <i>P</i> =.33   |
| ONCOTYPEDX                                  | -0.012 (-0.025 to 0.0037), <i>P</i> =1.0    | -0.0046 (-0.016 to 0.0038), <i>P</i> =1.0   | -0.0094 (-0.022 to 0.003), <i>P</i> =.9    | -0.012 (-0.026 to 0.0019), <i>P</i> =1.0   | -0.0081 (-0.02 to 0.0036), <i>P</i> =1.0 | -0.021 (-0.039 to -0.0053), <i>P</i> =.33   |
| GGI                                         | -0.0084 (-0.015 to 0.0017), <i>P</i> =1.0   | -0.00055 (-0.0058 to 0.0056), <i>P</i> =1.0 | -0.0051 (-0.012 to 0.0019), <i>P</i> =1.0  | -0.0076 (-0.015 to 0.0021), <i>P</i> =1.0  | -0.0042 (-0.015 to 0.011), <i>P</i> =1.0 | -0.016 (-0.024 to -0.0081), <i>P</i> =0.035 |

\*Two-sided *P*-values estimated by two-sample Wilcoxon signed rank test comparing the cross-validated partial (log-)likelihood (CVPL, the lower the better) of the subtype classifiers and published prognostic gene signatures. The median difference is to be interpreted as the CVPL of the classifier in row minus the CVPL of the classifier in column. Note that *P*-values were corrected for multiple testing using Holm's method. SCMGENE: three-gene subtype classification model; SCMOD2: subtype classification model published by Wirapati et al. (8); SCMOD1: subtype classification model published by Desmedt et al. (1); PAM50: single sample predictor published by Parker et al. (3); SSP2006: single sample predictor published by Hu et al. (2). SSP2003: single sample predictor published Sorlie et al. (6); MAMMAPRINT: prognostic gene signature published by van't Veer et al. (14); ONCOTYPE: prognostic gene signature published by Paik et al. (15); GGI: prognostic gene signature published by Sotiriou et al. (16).
